# Supplementary material for: Significant Burden and Psychological Distress Among Caregivers of Children With Nephrotic Syndrome: A Cross-Sectional Study
Source: PubMed Central journal article supplement — Can J Kidney Health Dis. 2020 Jan 8;7:2054358119898016. doi: 10.1177/2054358119898016 (PMC6950537; doi:10.1177/2054358119898016), 2020-01-08
Supplement: Statistical_models-_supplementary_file_CJKHD-19-0056.R2.pdf [file Statistical_models-_supplementary_file_CJKHD-19-0056.R2.pdf]

**LOGISTIC REGRESSION VARIABLES mZarit**

```
/METHOD=ENTER Ageyr Gender rRship rMarStat rOtherImm CurrentStat rSour rHos p6month  
Groups OnlyCh Duration Children SES  
/CONTRAST (Gender)=Indicator(1)  
/CONTRAST (rRship)=Indicator  
/CONTRAST (rOtherImm)=Indicator(1)  
/CONTRAST (CurrentStat)=Indicator(1)  
/CONTRAST (rSour)=Indicator(1)  
/CONTRAST (rHosp6month)=Indicator(1)  
/CONTRAST (Groups)=Indicator  
/CONTRAST (OnlyCh)=Indicator(1)  
/CONTRAST (SES)=Indicator(1)  
/CONTRAST (rMarStat)=Indicator(1)  
/PRINT=CI(95)  
/CRITERIA=PIN(0.05) POUT(0.10) ITERATE(20) CUT(0.5).
```

**Logistic Regression**

[DataSet2] C:\Users\Chris\Dropbox\Documents\Nephrotic syndrome & depression\P sychosocial working database May 2019.xlsx.sav

Case Processing Summary

| Unweighted Cases <sup>a</sup> |                      | N   | Percent |
|-------------------------------|----------------------|-----|---------|
| Selected Cases                | Included in Analysis | 172 | 100.0   |
|                               | Missing Cases        | 0   | .0      |
|                               | Total                | 172 | 100.0   |
| Unselected Cases              |                      | 0   | .0      |
| Total                         |                      | 172 | 100.0   |

a. If weight is in effect, see classification table for the total number of cases.

Dependent Variable Encoding

| Original Value | Internal Value |
|----------------|----------------|
| 0              | 0              |
| 1              | 1              |

**Categorical Variables Codings**

|             |      | Frequency | Parameter coding |       |
|-------------|------|-----------|------------------|-------|
|             |      |           | (1)              | (2)   |
| SES         | 0    | 42        | .000             | .000  |
|             | 2    | 66        | 1.000            | .000  |
|             | 1    | 64        | .000             | 1.000 |
| Groups      | 1    | 24        | 1.000            | .000  |
|             | 2    | 20        | .000             | 1.000 |
|             | 0    | 128       | .000             | .000  |
| rRship      | 1    | 134       | 1.000            |       |
|             | 0    | 38        | .000             |       |
| rMarStat    | .00  | 159       | .000             |       |
|             | 1.00 | 13        | 1.000            |       |
| rOtherImm   | 0    | 142       | .000             |       |
|             | ye   | 30        | 1.000            |       |
| CurrentStat | 0    | 139       | .000             |       |
|             | 1    | 33        | 1.000            |       |
| rSour       | 0    | 133       | .000             |       |
|             | 1    | 39        | 1.000            |       |
| OnlyCh      | 0    | 157       | .000             |       |
|             | 1    | 15        | 1.000            |       |
| rHosp6month | 0    | 127       | .000             |       |
|             | 1    | 45        | 1.000            |       |
| Gender      | 0    | 60        | .000             |       |
|             | 1    | 112       | 1.000            |       |

**Block 0: Beginning Block**

Classification Table<sup>a,b</sup>

| Observed                  |   | Predicted |   |                    |
|---------------------------|---|-----------|---|--------------------|
|                           |   | mZarit    |   | Percentage Correct |
|                           |   | 0         | 1 |                    |
| Step 0 mZarit             | 0 | 142       | 0 | 100.0              |
|                           | 1 | 30        | 0 | .0                 |
| <b>Overall Percentage</b> |   |           |   | <b>82.6</b>        |

a. Constant is included in the model.

b. The cut value is .500

Variables in the Equation

|                 | B      | S.E. | Wald   | df | Sig. | Exp(B) |
|-----------------|--------|------|--------|----|------|--------|
| Step 0 Constant | -1.555 | .201 | 59.860 | 1  | .000 | .211   |

Variables not in the Equation

|                        | Score  | df | Sig. |
|------------------------|--------|----|------|
| Step 0 Variables Ageyr | .113   | 1  | .737 |
| Gender(1)              | 3.544  | 1  | .060 |
| rRship(1)              | .622   | 1  | .430 |
| rMarStat(1)            | .041   | 1  | .839 |
| rOtherImm(1)           | 6.373  | 1  | .012 |
| CurrentStat(1)         | 7.161  | 1  | .007 |
| rSour(1)               | 2.355  | 1  | .125 |
| rHosp6month(1)         | 2.075  | 1  | .150 |
| Groups                 | 4.892  | 2  | .087 |
| Groups(1)              | .012   | 1  | .914 |
| Groups(2)              | 4.845  | 1  | .028 |
| OnlyCh(1)              | .971   | 1  | .324 |
| Duration               | 2.358  | 1  | .125 |
| Children               | .302   | 1  | .583 |
| SES                    | .392   | 2  | .822 |
| SES(1)                 | .041   | 1  | .840 |
| SES(2)                 | .121   | 1  | .728 |
| Overall Statistics     | 25.148 | 15 | .048 |

Block 1: Method = Enter

Omnibus Tests of Model Coefficients

|             | Chi-square | df | Sig. |
|-------------|------------|----|------|
| Step 1 Step | 27.210     | 15 | .027 |
| Block       | 27.210     | 15 | .027 |
| Model       | 27.210     | 15 | .027 |

Model Summary

| Step | -2 Log likelihood    | Cox & Snell R Square | Nagelkerke R Square |
|------|----------------------|----------------------|---------------------|
| 1    | 132.002 <sup>a</sup> | .146                 | .242                |

a. Estimation terminated at iteration number 6 because parameter estimates changed by less than .001.

Classification Table<sup>a</sup>

| Observed           |        | Predicted |   |                       |
|--------------------|--------|-----------|---|-----------------------|
|                    |        | mZarit    |   | Percentage<br>Correct |
|                    |        | 0         | 1 |                       |
| Step 1             | mZarit | 0         | 1 | 97.9                  |
|                    |        | 1         |   | 13.3                  |
| Overall Percentage |        |           |   | 83.1                  |

a. The cut value is .500

Variables in the Equation

|                     |                | B      | S.E.  | Wald  | df | Sig. | Exp(B) |
|---------------------|----------------|--------|-------|-------|----|------|--------|
| Step 1 <sup>a</sup> | Ageyr          | -.023  | .069  | .108  | 1  | .742 | .978   |
|                     | Gender(1)      | 1.528  | .624  | 5.988 | 1  | .014 | 4.609  |
|                     | rRship(1)      | .280   | .605  | .214  | 1  | .643 | 1.323  |
|                     | rMarStat(1)    | -.248  | 1.077 | .053  | 1  | .818 | .780   |
|                     | rOtherImm(1)   | .856   | .744  | 1.325 | 1  | .250 | 2.354  |
|                     | CurrentStat(1) | 1.193  | .508  | 5.528 | 1  | .019 | 3.298  |
|                     | rSour(1)       | 1.119  | .543  | 4.250 | 1  | .039 | 3.061  |
|                     | rHosp6month(1) | .749   | .503  | 2.215 | 1  | .137 | 2.115  |
|                     | Groups         |        |       | 4.166 | 2  | .125 |        |
|                     | Groups(1)      | -.646  | .836  | .597  | 1  | .440 | .524   |
|                     | Groups(2)      | 1.131  | .847  | 1.781 | 1  | .182 | 3.098  |
|                     | OnlyCh(1)      | .556   | 1.014 | .300  | 1  | .584 | 1.743  |
|                     | Duration       | .008   | .011  | .485  | 1  | .486 | 1.008  |
|                     | Children       | -.169  | .250  | .457  | 1  | .499 | .844   |
|                     | SES            |        |       | 1.262 | 2  | .532 |        |
|                     | SES(1)         | .695   | .657  | 1.117 | 1  | .291 | 2.003  |
|                     | SES(2)         | .251   | .630  | .158  | 1  | .691 | 1.285  |
|                     | Constant       | -3.974 | 1.257 | 9.996 | 1  | .002 | .019   |

Variables in the Equation

|                     |                | 95% C.I. for EXP(B) |        |
|---------------------|----------------|---------------------|--------|
|                     |                | Lower               | Upper  |
| Step 1 <sup>a</sup> | Ageyr          | .855                | 1.118  |
|                     | Gender(1)      | 1.355               | 15.675 |
|                     | rRship(1)      | .404                | 4.329  |
|                     | rMarStat(1)    | .095                | 6.436  |
|                     | rOtherImm(1)   | .548                | 10.112 |
|                     | CurrentStat(1) | 1.220               | 8.919  |
|                     | rSour(1)       | 1.057               | 8.869  |
|                     | rHosp6month(1) | .789                | 5.674  |
|                     | Groups         |                     |        |
|                     | Groups(1)      | .102                | 2.699  |
|                     | Groups(2)      | .589                | 16.304 |
|                     | OnlyCh(1)      | .239                | 12.718 |
|                     | Duration       | .986                | 1.030  |
|                     | Children       | .517                | 1.379  |
|                     | SES            |                     |        |
|                     | SES(1)         | .552                | 7.268  |
|                     | SES(2)         | .374                | 4.416  |
|                     | Constant       |                     |        |

a. Variable(s) entered on step 1: Ageyr, Gender, rRship, rMarStat, rOtherImm, CurrentStat, rSour, rHosp6month, Groups, OnlyCh, Duration, Children, SES.

**LOGISTIC REGRESSION VARIABLES Psy\_Dis**

```

/METHOD=ENTER Ageyr Gender rRship rMarStat rOtherImm CurrentStat rSour rHos p6month
Groups OnlyCh Duration Children SES
/CONTRAST (Gender)=Indicator(1)
/CONTRAST (rRship)=Indicator
/CONTRAST (rOtherImm)=Indicator(1)
/CONTRAST (CurrentStat)=Indicator(1)
/CONTRAST (rSour)=Indicator(1)
/CONTRAST (rHosp6month)=Indicator(1)
/CONTRAST (Groups)=Indicator
/CONTRAST (OnlyCh)=Indicator(1)
/CONTRAST (SES)=Indicator(1)
/CONTRAST (rMarStat)=Indicator(1)
/PRINT=CI(95)
/CRITERIA=PIN(0.05) POUT(0.10) ITERATE(20) CUT(0.5).

```

**Logistic Regression**

[DataSet2] C:\Users\Chris\Dropbox\Documents\Nephrotic syndrome & depression\PSychosocial working database May 2019.xlsx.sav

Case Processing Summary

| Unweighted Cases <sup>a</sup> |                      | N   | Percent |
|-------------------------------|----------------------|-----|---------|
| Selected Cases                | Included in Analysis | 172 | 100.0   |
|                               | Missing Cases        | 0   | .0      |
|                               | Total                | 172 | 100.0   |
| Unselected Cases              |                      | 0   | .0      |
| Total                         |                      | 172 | 100.0   |

a. If weight is in effect, see classification table for the total number of cases.

Dependent Variable Encoding

| Original Value | Internal Value |
|----------------|----------------|
| 0              | 0              |
| 1              | 1              |

Categorical Variables Codings

|             |      | Frequency | Parameter coding |       |
|-------------|------|-----------|------------------|-------|
|             |      |           | (1)              | (2)   |
| SES         | 0    | 42        | .000             | .000  |
|             | 2    | 66        | 1.000            | .000  |
|             | 1    | 64        | .000             | 1.000 |
| Groups      | 1    | 24        | 1.000            | .000  |
|             | 2    | 20        | .000             | 1.000 |
|             | 0    | 128       | .000             | .000  |
| rRship      | 1    | 134       | 1.000            |       |
|             | 0    | 38        | .000             |       |
| rMarStat    | .00  | 159       | .000             |       |
|             | 1.00 | 13        | 1.000            |       |
| rOtherImm   | 0    | 142       | .000             |       |
|             | ye   | 30        | 1.000            |       |
| CurrentStat | 0    | 139       | .000             |       |
|             | 1    | 33        | 1.000            |       |
| rSour       | 0    | 133       | .000             |       |
|             | 1    | 39        | 1.000            |       |
| OnlyCh      | 0    | 157       | .000             |       |
|             | 1    | 15        | 1.000            |       |
| rHosp6month | 0    | 127       | .000             |       |
|             | 1    | 45        | 1.000            |       |

**Categorical Variables Codings**

|          | Frequency | Parameter coding |     |
|----------|-----------|------------------|-----|
|          |           | (1)              | (2) |
| Gender 0 | 60        | .000             |     |
| Gender 1 | 112       | 1.000            |     |

**Block 0: Beginning Block**

Classification Table<sup>a,b</sup>

| Observed           | Predicted |   |            |
|--------------------|-----------|---|------------|
|                    | Psy_Dis   |   | Percentage |
|                    | 0         | 1 | Correct    |
| Step 0 Psy_Dis 0   | 119       | 0 | 100.0      |
| Step 0 Psy_Dis 1   | 53        | 0 | .0         |
| Overall Percentage |           |   | 69.2       |

a. Constant is included in the model.

b. The cut value is .500

Variables in the Equation

|                 | B     | S.E. | Wald   | df | Sig. | Exp(B) |
|-----------------|-------|------|--------|----|------|--------|
| Step 0 Constant | -.809 | .165 | 23.989 | 1  | .000 | .445   |

Variables not in the Equation

|        |                    | Score  | df | Sig. |
|--------|--------------------|--------|----|------|
| Step 0 | Variables          |        |    |      |
|        | Ageyr              | 1.732  | 1  | .188 |
|        | Gender(1)          | .266   | 1  | .606 |
|        | rRship(1)          | .080   | 1  | .778 |
|        | rMarStat(1)        | .000   | 1  | .997 |
|        | rOtherImm(1)       | 4.284  | 1  | .038 |
|        | CurrentStat(1)     | 5.981  | 1  | .014 |
|        | rSour(1)           | 3.861  | 1  | .049 |
|        | rHosp6month(1)     | 2.412  | 1  | .120 |
|        | Groups             | 8.061  | 2  | .018 |
|        | Groups(1)          | 4.816  | 1  | .028 |
|        | Groups(2)          | 2.136  | 1  | .144 |
|        | OnlyCh(1)          | .049   | 1  | .825 |
|        | Duration           | .138   | 1  | .711 |
|        | Children           | .430   | 1  | .512 |
|        | SES                | 1.378  | 2  | .502 |
|        | SES(1)             | .051   | 1  | .822 |
|        | SES(2)             | .606   | 1  | .436 |
|        | Overall Statistics | 20.199 | 15 | .164 |

Block 1: Method = Enter

Omnibus Tests of Model Coefficients

|        |       | Chi-square | df | Sig. |
|--------|-------|------------|----|------|
| Step 1 | Step  | 20.747     | 15 | .145 |
|        | Block | 20.747     | 15 | .145 |
|        | Model | 20.747     | 15 | .145 |

Model Summary

| Step | -2 Log likelihood    | Cox & Snell R Square | Nagelkerke R Square |
|------|----------------------|----------------------|---------------------|
| 1    | 191.708 <sup>a</sup> | .114                 | .160                |

a. Estimation terminated at iteration number 4 because parameter estimates changed by less than .001.



Classification Table<sup>a</sup>

| Observed           | Predicted |    |                    |
|--------------------|-----------|----|--------------------|
|                    | Psy_Dis   |    | Percentage Correct |
|                    | 0         | 1  |                    |
| Step 1 Psy_Dis 0   | 108       | 11 | 90.8               |
| 1                  | 41        | 12 | 22.6               |
| Overall Percentage |           |    | 69.8               |

a. The cut value is .500

Variables in the Equation

|                           | B      | S.E. | Wald  | df | Sig. | Exp(B) |
|---------------------------|--------|------|-------|----|------|--------|
| Step 1 <sup>a</sup> Ageyr | .021   | .055 | .141  | 1  | .707 | 1.021  |
| Gender(1)                 | .360   | .404 | .796  | 1  | .372 | 1.433  |
| rRship(1)                 | -.129  | .444 | .084  | 1  | .771 | .879   |
| rMarStat(1)               | .086   | .786 | .012  | 1  | .913 | 1.089  |
| rOtherImm(1)              | .165   | .613 | .073  | 1  | .787 | 1.180  |
| CurrentStat(1)            | .894   | .429 | 4.334 | 1  | .037 | 2.445  |
| rSour(1)                  | .605   | .436 | 1.925 | 1  | .165 | 1.831  |
| rHosp6month(1)            | .693   | .411 | 2.839 | 1  | .092 | 2.000  |
| Groups                    |        |      | 3.156 | 2  | .206 |        |
| Groups(1)                 | .979   | .565 | 2.999 | 1  | .083 | 2.663  |
| Groups(2)                 | .840   | .724 | 1.347 | 1  | .246 | 2.317  |
| OnlyCh(1)                 | .460   | .833 | .305  | 1  | .581 | 1.584  |
| Duration                  | -.004  | .009 | .174  | 1  | .677 | .996   |
| Children                  | .085   | .192 | .194  | 1  | .660 | 1.088  |
| SES                       |        |      | 1.655 | 2  | .437 |        |
| SES(1)                    | .648   | .520 | 1.550 | 1  | .213 | 1.911  |
| SES(2)                    | .528   | .496 | 1.130 | 1  | .288 | 1.695  |
| Constant                  | -2.608 | .876 | 8.856 | 1  | .003 | .074   |

Variables in the Equation

|                     |                | 95% C.I. for EXP(B) |       |
|---------------------|----------------|---------------------|-------|
|                     |                | Lower               | Upper |
| Step 1 <sup>a</sup> | Ageyr          | .917                | 1.137 |
|                     | Gender(1)      | .650                | 3.161 |
|                     | rRship(1)      | .368                | 2.098 |
|                     | rMarStat(1)    | .233                | 5.087 |
|                     | rOtherImm(1)   | .355                | 3.924 |
|                     | CurrentStat(1) | 1.054               | 5.671 |
|                     | rSour(1)       | .779                | 4.303 |
|                     | rHosp6month(1) | .893                | 4.477 |
|                     | Groups         |                     |       |
|                     | Groups(1)      | .879                | 8.066 |
|                     | Groups(2)      | .561                | 9.575 |
|                     | OnlyCh(1)      | .310                | 8.107 |
|                     | Duration       | .978                | 1.014 |
|                     | Children       | .747                | 1.586 |
|                     | SES            |                     |       |
|                     | SES(1)         | .689                | 5.297 |
|                     | SES(2)         | .641                | 4.483 |
|                     | Constant       |                     |       |

a. Variable(s) entered on step 1: Ageyr, Gender, rRship, rMarStat, rOtherImm, CurrentStat, rSour, rHosp6month, Groups, OnlyCh, Duration, Children, SES.
